# Supplementary material for: Targeting thymidine phosphorylase as a potential therapy for bone loss associated with periprosthetic osteolysis
Source: PubMed Central journal article supplement (PMC8459589; doi:10.1002/btm2.10232), 2021-06-08
Supplement: BTM2-6-e10232-s001.pdf [file BTM2-6-e10232-s001.pdf]

## Supplementary material

**Supplementary Table.** Primers used in this study for qRT-PCR.

| <b>Target</b>                  | <b>Forward</b>           | <b>Reverse</b>         |
|--------------------------------|--------------------------|------------------------|
| <b>hFYN</b>                    | TCATGATCTGCGCTTCCTCAA    | TGGGCAGTTTGGGGAAGTATG  |
| <b>mTYMP</b>                   | TGCACGCGGTGATAGATGG      | AGCATGGCCCAATTTGTGT    |
| <b>mTNF<math>\alpha</math></b> | AGCCGATGGGTTGTACCTT      | ATAGCAAATCGGCTGACG     |
| <b>mIL-7</b>                   | TGCCCCGAATAATGAACCAAACCT | TGCGAGCAGCACGATTTAGA   |
| <b>mIL-23</b>                  | TAATGTGCCCCGTATCCAGTG    | GGCTGTTGTCCTTGAGTCCT   |
| <b>mCTSK</b>                   | CAGAAGCAGTATAACAGCAAGGT  | CCCAAATTAACGCCGAGAGA   |
| <b>mNGF</b>                    | CATCCACCCACCCAGTCTTC     | CCAACCCACACACTGACACT   |
| <b>mTNFSF13</b>                | GCAGTACTCACCCAGAAGCA     | TGTAACTGGAACAAGATGCAGG |
| <b>mBAFF</b>                   | GTGGTGAGGCAAACAGGCTA     | GCAAAGATGGGGTCCGTGTA   |
| <b>mTNFSF14</b>                | TTGTGGTGGATGGACAGACG     | GTCTCCGGTGGTTCTGTTCC   |
| <b>mTNFSF15</b>                | CACATTCCGAGGGACCACAT     | AGTCTGGCTTGTTTGGTCGT   |

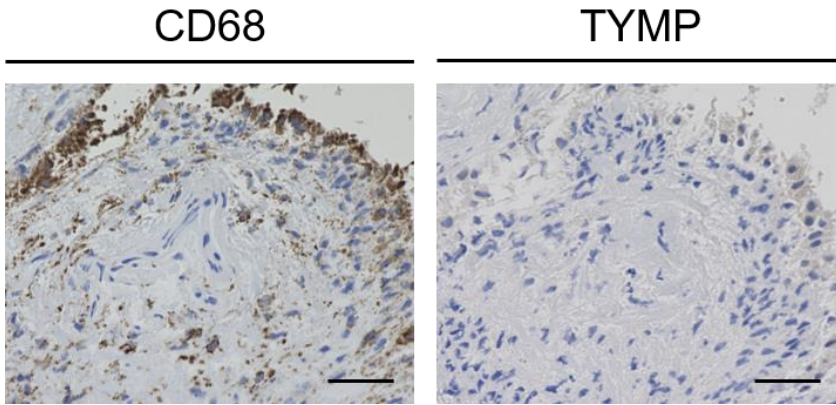

**Supplementary FIGURE1** Representative images for immunohistochemistry staining of synovial tissues from primary TJA patient. Formalin-fixed tissues were stained by specific antibody to CD68 and TYMP. Very weak signals for TYMP were detected in tissues. Scale bars are 50  $\mu$ m.

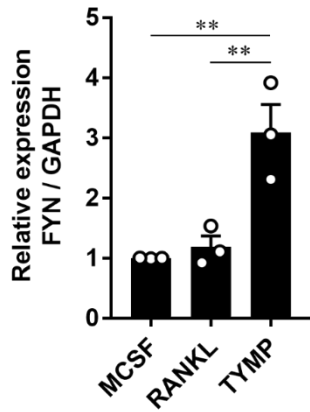

**Supplementary FIGURE2** Expression of FYN in macrophages stimulated with cytokines for 3h as analyzed by qRT-PCR. Results represent the means  $\pm$  SEM for three samples and significant difference was determined by the One-way ANOVA, followed by Tukey's multiple-comparison procedure.

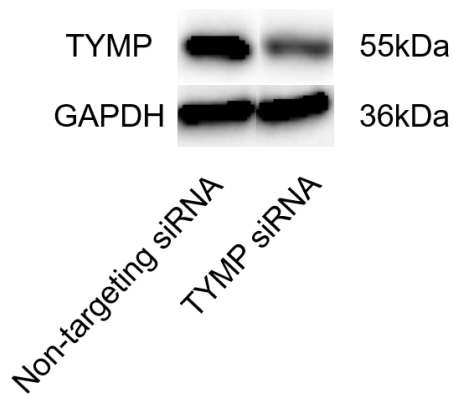

**Supplementary FIGURE3** Protein expression of TYMP in macrophages after specific TYMP siRNA treatment. Human macrophages were analyzed by Western blot analysis after 24 h treatment by siRNA for detection of TYMP and GAPDH. Image representative of knockdown of TYMP by siRNA.
